# Supplementary material
Source: PubMed Central journal article supplement (PMC5967429)
Supplement: CJN.06790617SupplementaryData.pdf [file CJN.06790617SupplementaryData.pdf]

## Supplemental Material

**Table S1. Intervention elements based on the “5As” for CKD-MIT medication therapy management.<sup>1,2</sup>**

| Process category of “5As” | Intervention elements                                                                                                                                  |
|---------------------------|--------------------------------------------------------------------------------------------------------------------------------------------------------|
| 1. <b>Assessment</b>      | Determine medication problems and discrepancies                                                                                                        |
| 2. <b>Advice</b>          | Answer questions or concerns<br>Carry updated medication list<br>Avoid contraindicated medicines                                                       |
| 3. <b>Agreement</b>       | Take medication<br>Manage the medication list                                                                                                          |
| 4. <b>Assistance</b>      | Plan for medication-taking<br>Inform providers about medication practices<br>Overcome barriers to medication management                                |
| 5. <b>Arrangements</b>    | Adjust doses for kidney function<br>Assistance from caregivers<br>Update and verify medication list<br>Obtain medicine<br>Report concerns to providers |

## References

1. Glasgow RE, Emont S, Miller DC. Assessing delivery of the five “As” for patient-centered counseling. *Health Promot Int* 2006;21:245-255.
2. Jack BW, Chetty VK, Anthony D, Greenwald JL, Sanchez GM, Johnson AE, Forsythe SR, O'Donnell JK, Paasche-Orlow MK, Manasseh C, Marin S, Culpepper L. A reengineered hospital discharge program to decrease rehospitalization. *Ann Intern Med* 2009;150:178-187.

**Table S2. Medication classes by study group at baseline in CKD-MIT (n=141)**

| Medication Class               | All Study Participants (Baseline N=141) |      | Usual Care Group (Baseline N=69) |      | Medication Intervention Group (Baseline N=72) |      | p value |
|--------------------------------|-----------------------------------------|------|----------------------------------|------|-----------------------------------------------|------|---------|
|                                | n/N                                     | (%)  | n/N                              | (%)  | n/N                                           | (%)  |         |
| ACE inhibitors and ARB         | 65/141                                  | (46) | 33/69                            | (48) | 32/72                                         | (44) | 0.69    |
| Diuretics                      | 85/141                                  | (60) | 47/69                            | (68) | 38/72                                         | (53) | 0.06    |
| Other anti-hypertensive agents | 98/141                                  | (70) | 49/69                            | (71) | 49/72                                         | (68) | 0.70    |
| Insulin                        | 52/141                                  | (37) | 26/69                            | (38) | 26/72                                         | (36) | 0.85    |
| Oral hypoglycemic agents       | 32/141                                  | (23) | 19/69                            | (28) | 13/72                                         | (18) | 0.18    |
| Statins                        | 86/141                                  | (61) | 42/69                            | (61) | 44/72                                         | (61) | 0.98    |
| Aspirin                        | 80/141                                  | (57) | 35/69                            | (51) | 45/72                                         | (63) | 0.16    |
| Other platelet inhibitors      | 29/141                                  | (21) | 15/69                            | (22) | 14/72                                         | (19) | 0.74    |
| Anticoagulants                 | 35/141                                  | (25) | 18/69                            | (26) | 17/72                                         | (24) | 0.73    |
| Nitrates                       | 30/141                                  | (21) | 12/69                            | (17) | 18/72                                         | (25) | 0.27    |
| Antibiotics                    | 33/141                                  | (23) | 16/69                            | (23) | 17/72                                         | (24) | 0.95    |
| Proton pump inhibitors         | 52/141                                  | (37) | 28/69                            | (41) | 24/72                                         | (33) | 0.37    |
| Other gastrointestinal agents  | 46/141                                  | (33) | 15/69                            | (22) | 23/72                                         | (32) | 0.17    |
| Vitamin D supplements          | 72/141                                  | (51) | 36/69                            | (52) | 36/72                                         | (50) | 0.80    |
| Uric acid lowering agents      | 30/141                                  | (21) | 16/69                            | (23) | 14/72                                         | (19) | 0.59    |
| Psychotropic agents            | 69/141                                  | (49) | 35/69                            | (51) | 34/72                                         | (47) | 0.68    |
| Opioid agents                  | 46/141                                  | (33) | 19/69                            | (28) | 27/72                                         | (38) | 0.21    |
| Acetaminophen                  | 48/141                                  | (34) | 26/69                            | (38) | 22/72                                         | (31) | 0.37    |
| Thyroid hormone                | 37/141                                  | (26) | 22/69                            | (32) | 15/72                                         | (21) | 0.14    |

**Abbreviations:** angiotensin converting enzyme (ACE), angiotensin receptor blockers (ARB)

**Table S3. Serious adverse events and adverse events in CKD-MIT**

| Type of Event                 | All Study Participants<br>(Baseline N=141) |               | Usual Care Group<br>(Baseline N=69) |               | Medication Intervention Group<br>(Baseline N=72) |               | p value      |
|-------------------------------|--------------------------------------------|---------------|-------------------------------------|---------------|--------------------------------------------------|---------------|--------------|
| <b>Serious Adverse Events</b> | n/N                                        | (%)           | n/N                                 | (%)           | n/N                                              | (%)           |              |
| Cardiovascular                | 9/141                                      | (6.4)         | 5/69                                | (7.2)         | 4/72                                             | (5.6)         | 0.72         |
| Gastrointestinal              | 11/141                                     | (7.8)         | 4/69                                | (5.8)         | 7/72                                             | (9.7)         | 0.50         |
| Infection                     | 9/141                                      | (6.4)         | 5/69                                | (7.2)         | 4/72                                             | (5.6)         | 0.72         |
| Neurological                  | 6/141                                      | (4.3)         | 4/69                                | (5.8)         | 2/72                                             | (2.8)         | 0.33         |
| Death                         | 5/141                                      | (3.6)         | 4/69                                | (5.8)         | 1/72                                             | (1.4)         | 0.35         |
| Respiratory                   | 5/141                                      | (3.6)         | 1/69                                | (1.4)         | 4/72                                             | (5.6)         | 0.35         |
| Kidney                        | 2/141                                      | (1.4)         | 1/69                                | (1.4)         | 1/72                                             | (1.4)         | 1.00         |
| Hematologic                   | 2/141                                      | (1.4)         | 0/69                                | (0.0)         | 2/72                                             | (2.8)         | 0.49         |
| Blood pressure                | 1/141                                      | (0.7)         | 1/69                                | (1.4)         | 0/72                                             | (0.0)         | 0.48         |
| Genitourinary                 | 1/141                                      | (0.7)         | 0/69                                | (0.0)         | 1/72                                             | (1.4)         | 0.50         |
| Metabolic/toxic               | 1/141                                      | (0.7)         | 1/69                                | (1.4)         | 0/72                                             | (0.0)         | 0.48         |
| Head and neck                 | 1/141                                      | (0.7)         | 1/69                                | (1.4)         | 0/72                                             | (0.0)         | 0.48         |
| <b>Total</b>                  | <b>53/141</b>                              | <b>(37.6)</b> | <b>27/69</b>                        | <b>(39.1)</b> | <b>26/72</b>                                     | <b>(36.1)</b> | <b>0.73</b>  |
| <b>Adverse Events</b>         | n/N                                        | (%)           | n/N                                 | (%)           | n/N                                              | (%)           | p value      |
| Cardiovascular                | 5/141                                      | (3.6)         | 1/69                                | (1.4)         | 4/72                                             | (5.6)         | 0.64         |
| Infection                     | 9/141                                      | (6.4)         | 3/69                                | (4.4)         | 6/72                                             | (8.3)         | 1.00         |
| Gastrointestinal              | 4/141                                      | (2.8)         | 1/69                                | (1.4)         | 3/72                                             | (4.2)         | 1.00         |
| Head and neck                 | 4/141                                      | (2.8)         | 2/69                                | (2.9)         | 2/72                                             | (2.8)         | 0.59         |
| Kidney                        | 3/141                                      | (2.1)         | 1/69                                | (1.4)         | 2/72                                             | (2.8)         | 1.00         |
| Musculoskeletal               | 3/141                                      | (2.1)         | 1/69                                | (1.4)         | 2/72                                             | (2.8)         | 1.00         |
| Neurological                  | 2/141                                      | (1.4)         | 2/69                                | (2.9)         | 0/72                                             | (0.0)         | 0.44         |
| Skin                          | 2/141                                      | (1.4)         | 0/69                                | (0.0)         | 2/72                                             | (2.8)         | 0.54         |
| Respiratory                   | 1/141                                      | (0.7)         | 0/69                                | (0.0)         | 1/72                                             | (1.4)         | 1.00         |
| Metabolic/toxic               | 1/141                                      | (0.7)         | 0/69                                | (0.0)         | 1/72                                             | (1.4)         | 1.00         |
| Cancer                        | 1/141                                      | (0.7)         | 1/69                                | (1.4)         | 0/72                                             | (0.0)         | 0.34         |
| <b>Total</b>                  | <b>35/141</b>                              | <b>(24.8)</b> | <b>12/69</b>                        | <b>(17.4)</b> | <b>23/72</b>                                     | <b>(31.9)</b> | <b>0.053</b> |
